# Supplementary material
Source: Springer Nature journal article supplement (https://www.springermedizin.de/resource/supplementary/12936_2007_394_MOESM2_ESM.pdf/9547710)

A.

**Giemsa**

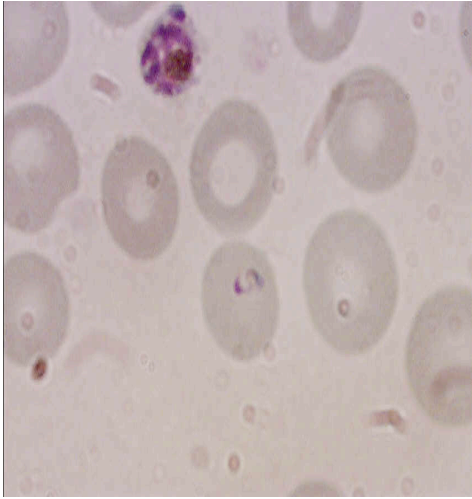

**Giemsa and SYBR**

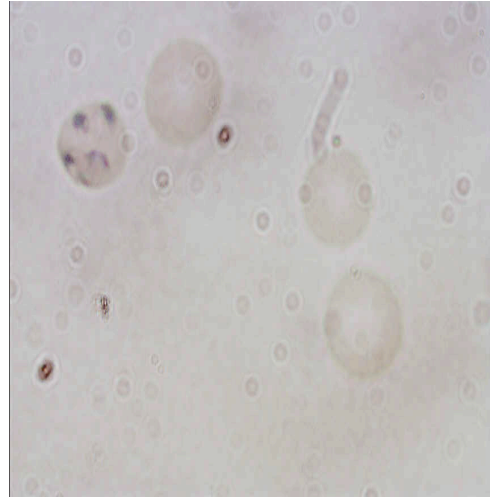

**Giemsa and SYBR**

B.

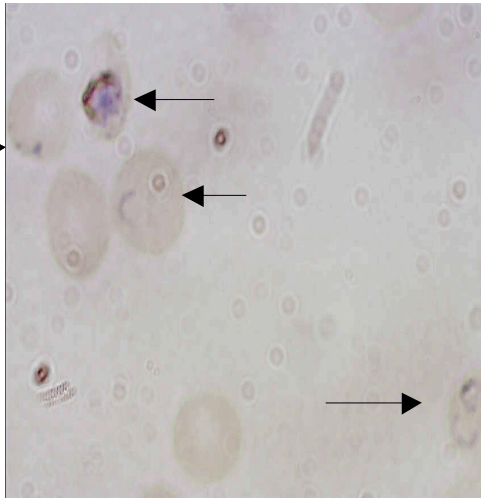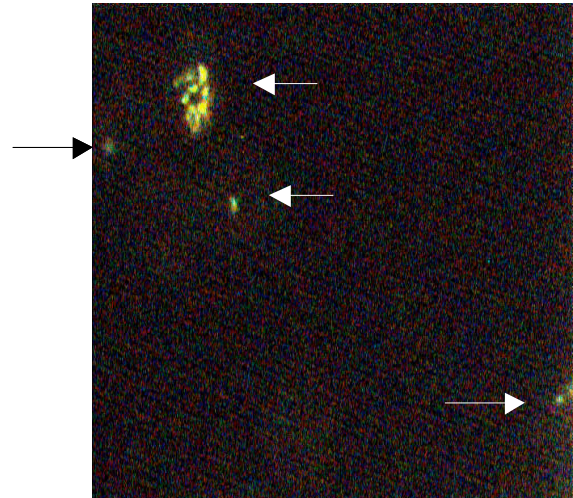

Supplement: MOESM2 [file 9547710]
